# Supplementary material
Source: publisher site journal article supplement (https://www.dovepress.com/article/446552)
Supplement: Supplementary file 1 [file get_supplementary_file.php]

**Supporting information**

*Min Chen* 1, #, **, Tao Liu* 2, #*, Wenqiang Li*3*, Yingting Li 1, Puxin Zhong 1, Huanchen Yan 1, Jingyin Kong 1, Weixiang Liang 2*

1 Department of Obstetrics and Gynecology, Department of Fetal Medicine and Prenatal Diagnosis; Guangdong Provincial Key Laboratory of Major Obstetric Diseases; Guangdong Provincial Clinical Research Center for Obstetrics and Gynecology; Guangdong-Hong Kong-Macao Greater Bay Area Higher Education Joint Laboratory of Maternal-Fetal Medicine; The Third Affiliated Hospital of Guangzhou Medical University, Guangzhou 510000, China.

2 Department of ultrasound; Guangdong Provincial Key Laboratory of Major Obstetric Diseases; Guangdong Provincial Clinical Research Center for Obstetrics and Gynecology; The Third Affiliated Hospital of Guangzhou Medical University, Guangzhou 510000, China.

3 Engineering Technology Research Center for Sports Assistive Devices of Guangdong, Guangzhou Sport University, Guangzhou 510076, China.

#**Author Contributions:** Min Chen and Tao Liu

These authors contributed equally to this work.

*****Correspondence:** Min Chen

E-mail: edchen99@gmail.com


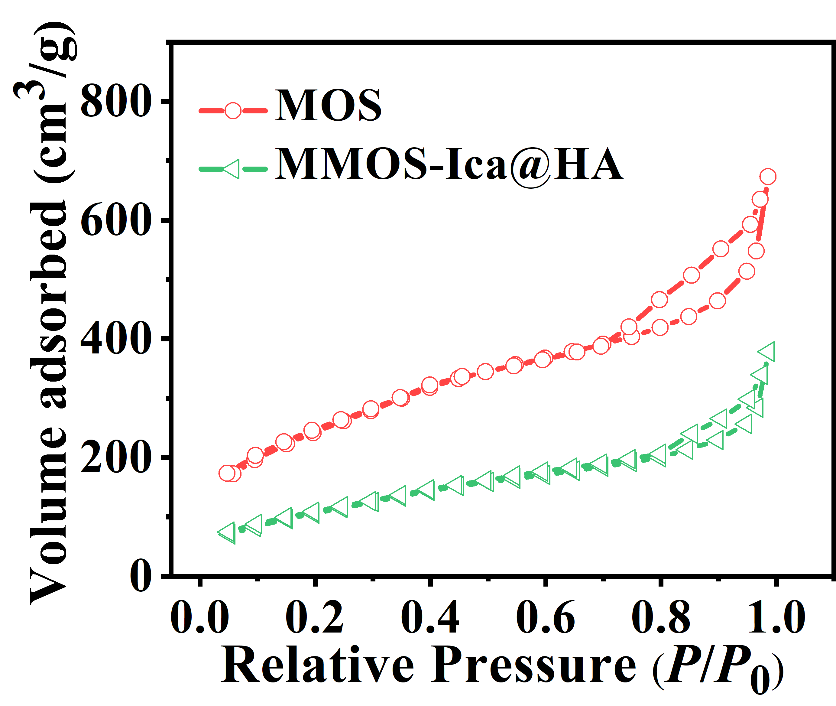


**Figure S1** N2 adsorption-desorption isotherm of MOS or MMOS-Ica@HA.


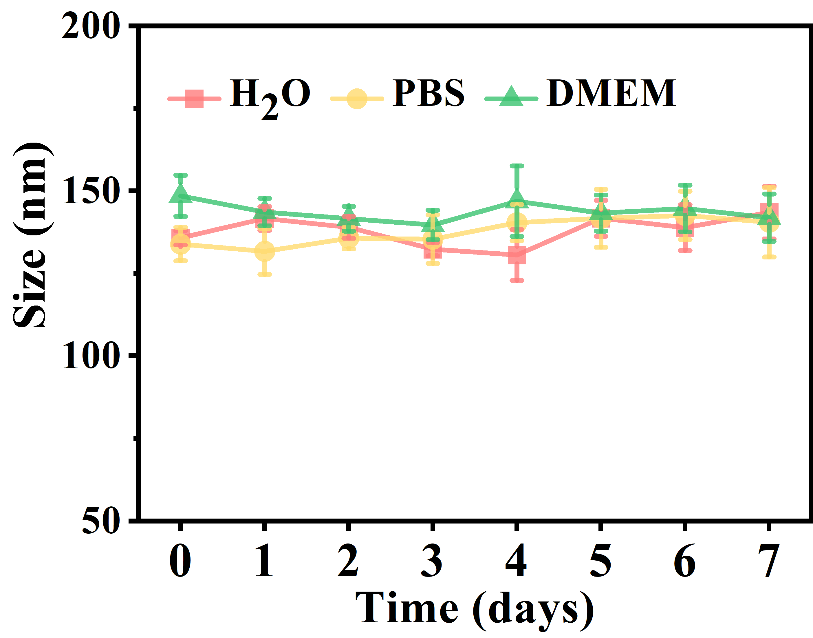


**Figure S2** Hydrodynamic particle size of MMOS-Ica@HA in H2O, PBS (pH 7.4) buffer, or DMEM within 7.0 days.


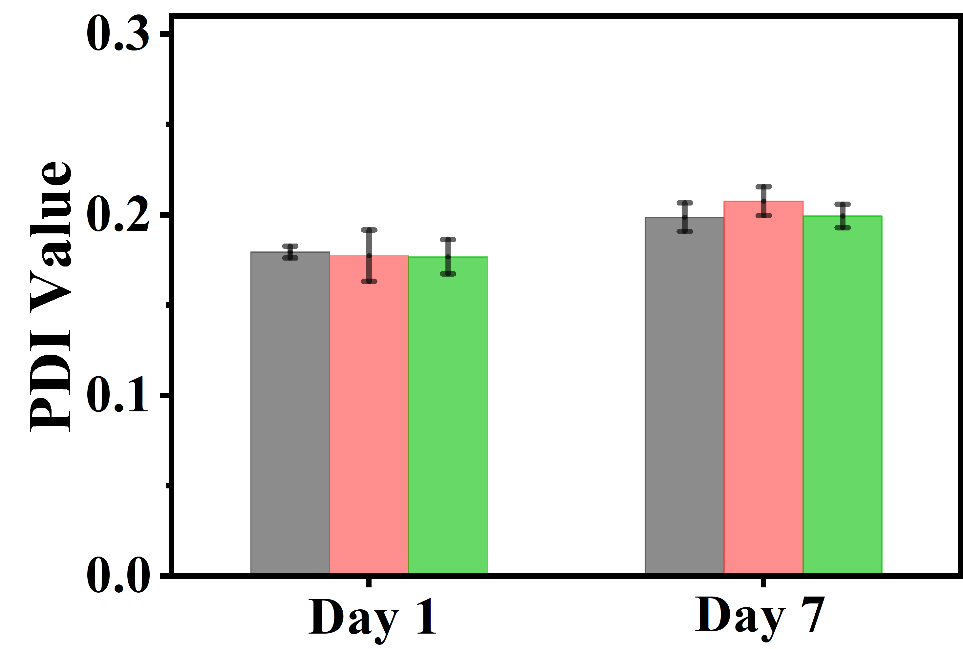


**Figure S3** Polydispersity index (PDI) value of MMOS-Ica@HA dispersed in deionized water, PBS buffer, or DMEM medium for 1 or 7 days, which is measured by DLS.


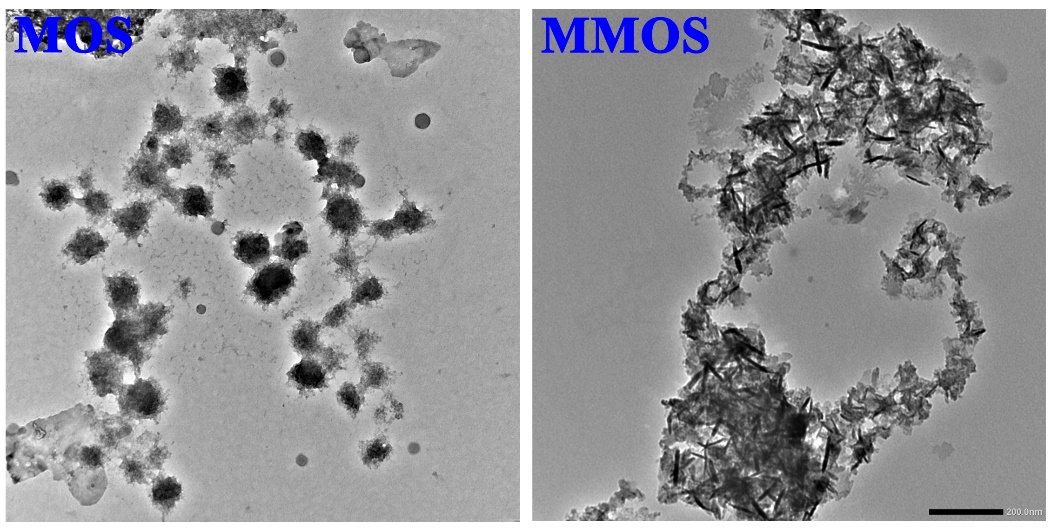


**Figure S4** TEM images of biodegradable MOS or MMOS after incubation in SBF solution containing 1.0 mM of GSH for 7.0 days


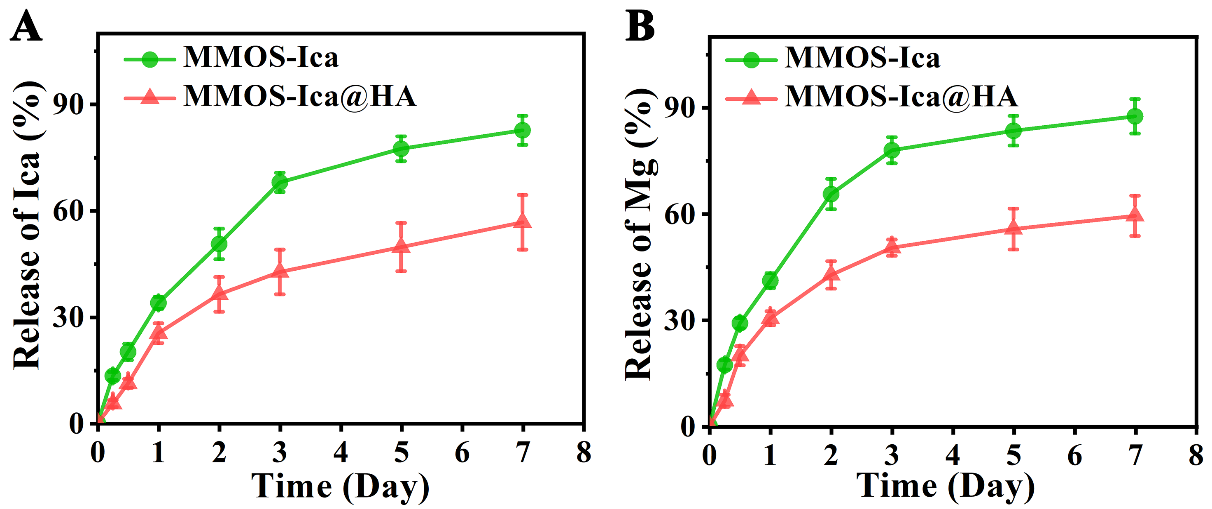


**Figure S5** Release profile of Ica (A) or Mg2+ (B) from MMOS-Ica and MMOS-Ica@HA nanoplatforms in PBS solution containing1.0 mM GSH


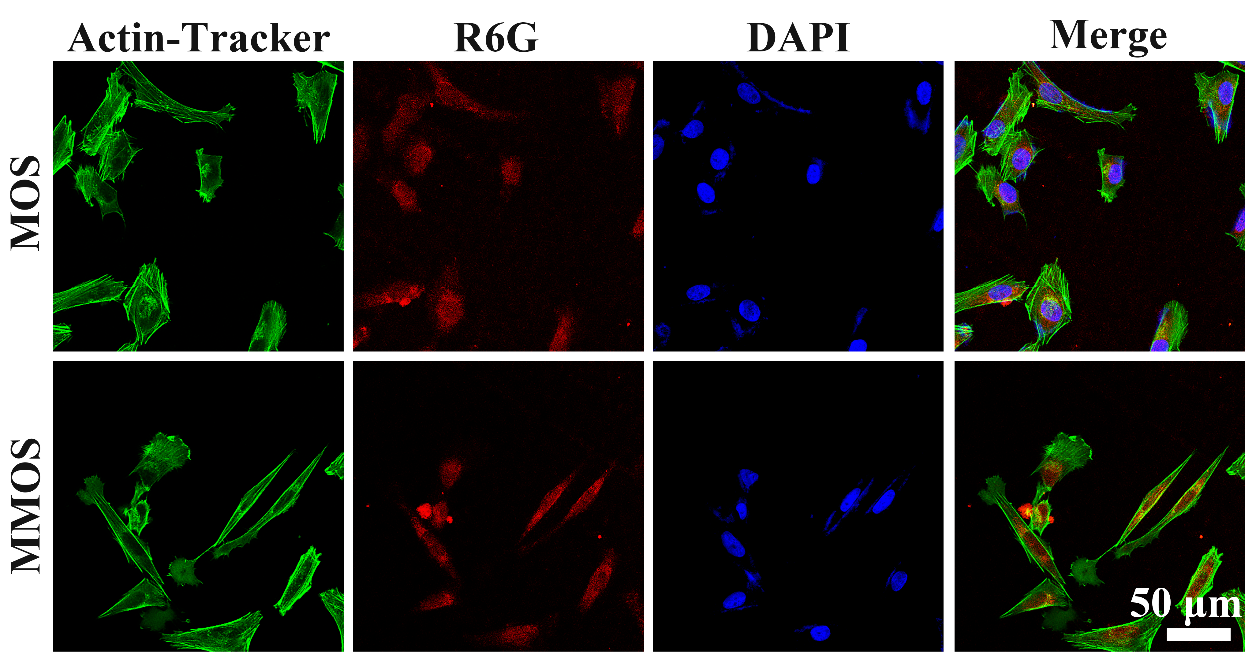


**Figure S6** CLSM results of BMSCs after treatment with R6G-labelled MOS or MMOS.


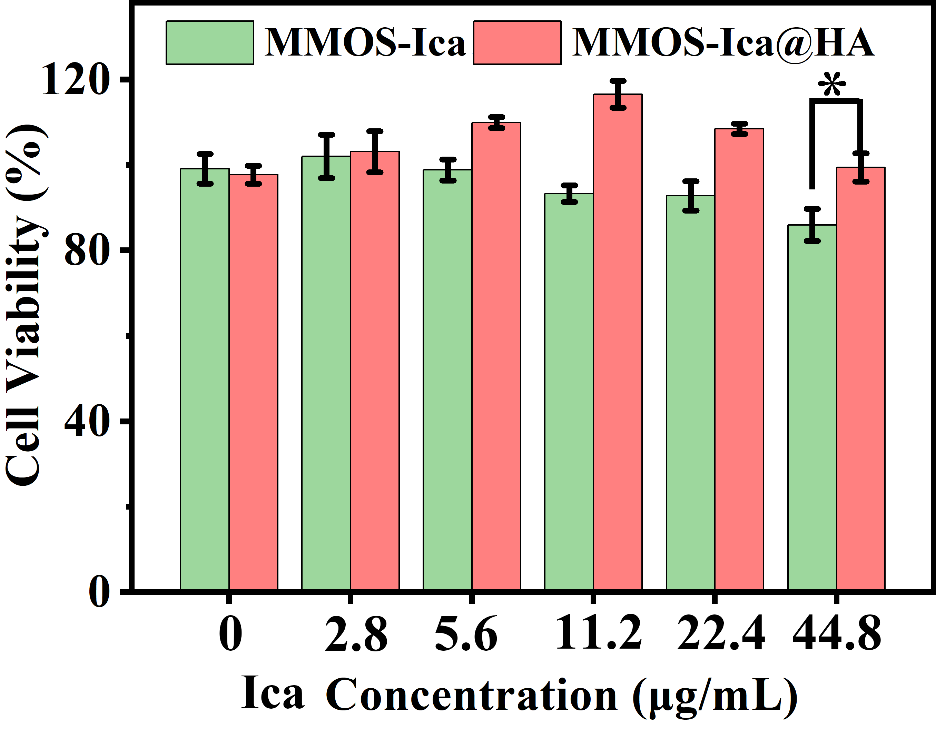


**Figure S7** Cell viability of BMSCs after incubation with different concentrations of MMOS-Ica or MMOS-Ica for 3.0 days. ** P* < 0.05, represents a significant difference.


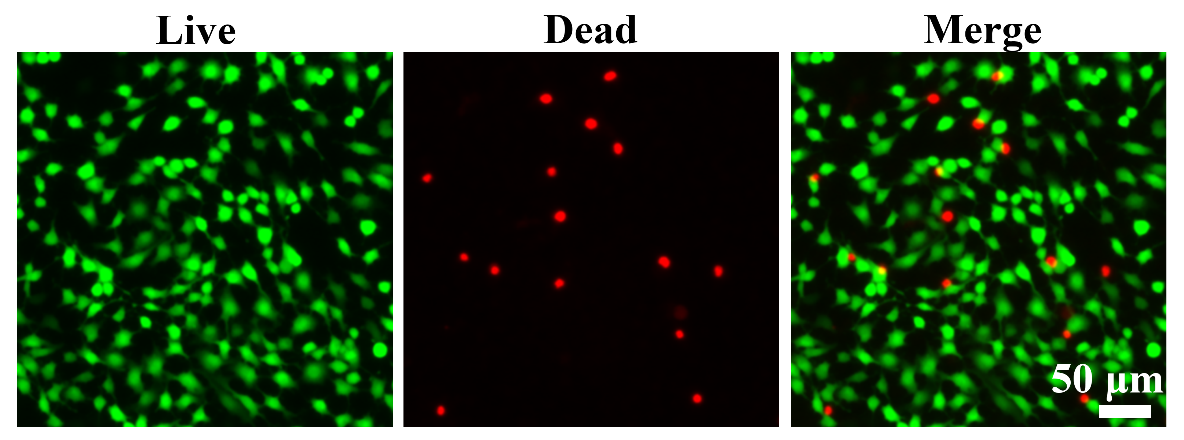


**Figure S8 Live/dead cell staining of BMSCs incubated with MMOS-Ica for 3.0 days.**


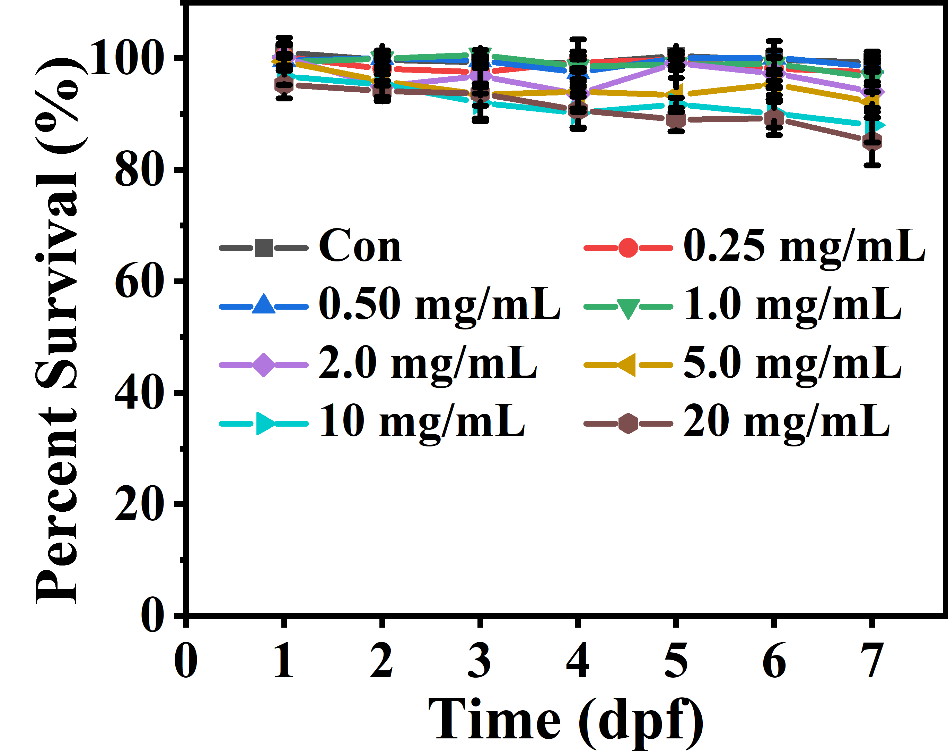


**Figure S9** Dose-response and time course of the percent survival for zebrafish.


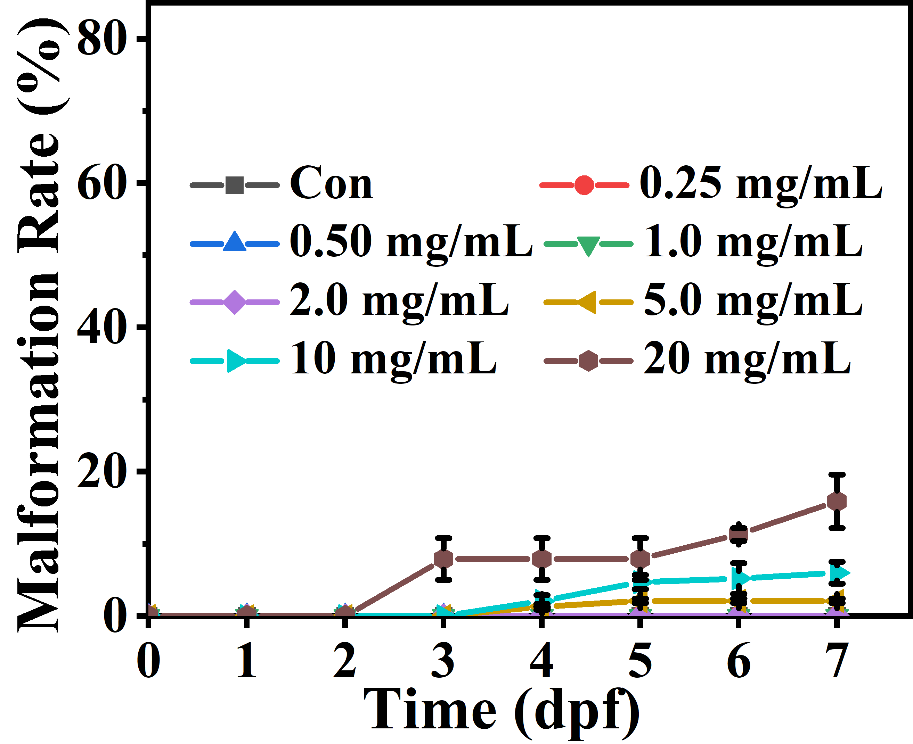


**Figure S10** Percent of malformed zebrafish treated with different concentrations of MMOS-Ica@HA nanoplatforms was analyzed at 1-7 dpf.
